# Supplementary material for: Tetrahedral honeycomb surface reconstructions of quartz, cristobalite and stishovite
Source: PubMed Central journal article supplement (PMC6085356; doi:10.1038/s41598-018-29853-1), 2018-08-09
Supplement: 41598_2018_29853_MOESM1_ESM.pdf [file 41598_2018_29853_MOESM1_ESM.pdf]

# Tetrahedral honeycomb surface reconstructions of quartz, cristobalite and stishovite

Oleg D.Feya<sup>1\*</sup>, Qinggao Wang<sup>5</sup>, Sergey V.Lepeshkin<sup>2,3</sup>, Vladimir S.Baturin<sup>2,3</sup>, Yurii A. Uspenskii<sup>3</sup> and Artem R. Oganov<sup>2,1,4\*</sup>

<sup>1</sup> Moscow Institute of Physics and Technology, Dolgoprudny, Moscow Region 141700, Russia

<sup>2</sup> Skolkovo Institute of Science and Technology, Skolkovo Innovation Center, Nobel St. 3, Moscow 143026, Russia.

<sup>3</sup> P.N. Lebedev Physical Institute, Russian Academy of Sciences - 119991 Leninskii Ave. 53, Moscow, Russia

<sup>4</sup> International Center for Materials Design, Northwestern Polytechnical University, Xi'an 710072, China

<sup>5</sup> School of Physics and Electronics, Henan University, Kaifeng 475004, China

\* Correspondence to feyaolkodmi@gmail.com and a.oganov@skoltech.ru

## Supplementary information

### 1. Initial substrates for evolutionary search

| Structure                                 | Composition (Si-O) | Cell shape (a,b,c in Å) | Cell shape ( $\alpha,\beta,\gamma$ ) |
|-------------------------------------------|--------------------|-------------------------|--------------------------------------|
| O-terminated $\alpha$ -quartz (001)       | 3 - 6              | 4.91, 4.91, 4.89        | 90°, 90°, 120°                       |
| O-terminated $\alpha$ -cristobalite (001) | 4 - 6              | 4.98, 4.98, 6.45        | 90°, 90°, 90°                        |
| Si-terminated stishovite (100)            | 4 - 6              | 4.18, 2.67, 8.35        | 90°, 90°, 90°                        |
| O-terminated stishovite (110)             | 4 - 6              | 2.67, 5.91, 5.24        | 90°, 90°, 90°                        |

Here,  $c$  means the thickness of the substrate in the direction perpendicular to the slab

### 2. POSCAR files of discussed surfaces

#### Dense cristobalite

```
1.0000000000000000
 9.955999999999995 0.0000000000000000 0.0000000000000000
 0.0000000000000000 4.977999999999998 0.0000000000000000
 0.0000000000000000 0.0000000000000000 41.398800000000014
Si O
28 56
Direct
0.1613091805894626 0.2188405858909590 0.3703307939771889
0.6612512718107766 0.2343835090263653 0.3693379400635024
0.1946694945627669 0.7187382922252894 0.3265755575132090
0.6971414103956022 0.7383365256453800 0.3257391559042233
0.4433803734795205 0.7664996022601471 0.2824910021939004
```

0.9468812196948093 0.5718134309986311 0.2826586133309661  
0.4394974460421324 0.2676954555589504 0.2390537195792746  
0.9419582899688166 0.0716695821793465 0.2388442121185648  
0.0900566221762773 0.9802951977359839 0.6051142356134704  
0.5772398271830426 0.4999648389997375 0.0898618965477098  
0.5898179173298104 0.4301044410620705 0.6054103973382894  
0.0772268398979605 0.9476087476365933 0.0898658239459209  
0.2766897166282689 0.4390848035730528 0.6054619810753366  
0.7638598220566095 0.9587281894687081 0.0896273833923829  
0.7765009794120772 0.9713922567640623 0.6052634903227272  
0.2638641439901903 0.4888820713283764 0.0897240561837620  
0.1993584099971315 0.7040051258815083 0.4999392494807395  
0.6900074703304924 0.2210435252363681 0.1951369405761199  
0.4138265403482038 0.0651406336120317 0.4119451744192943  
0.1849932789349609 0.2096724754644725 0.5434748767286450  
0.6721312081586959 0.7282796625094150 0.1515608851993164  
0.4489438374365449 0.5624907897808740 0.4552144008442340  
0.6953596500015848 0.7097329877983398 0.5000345492117475  
0.1901235335000280 0.2300497130732921 0.1950162868940168  
0.9101985987674510 0.2545646430684911 0.4139908750617067  
0.6815522745078155 0.1991373493337321 0.5435373816206877  
0.1729878604186865 0.7228068253395676 0.1515680081029060  
0.9452148754119918 0.7548738657751670 0.4571608832806859  
0.1848396067814662 0.7117158425311274 0.6076304682661089  
0.6722625631184656 0.2316933508898771 0.0874605855046795  
0.6823258952443041 0.1989608750795782 0.6237885722162773  
0.1695087960500388 0.7168566617458225 0.0713370848481958  
0.6847766146685359 0.6986530454159663 0.6077170561236969  
0.1720549644097176 0.2162456052260708 0.0875081320616431  
0.1819972300954831 0.2110159952044341 0.6237179959916404  
0.6691016084861019 0.7311624760474942 0.0712787490314142  
0.4335597455375364 0.4714854983842400 0.6190791316646127  
0.9211001998011241 0.9902144502011723 0.0761931123650470  
0.9336881930865815 0.9386290550204777 0.6186093895868368  
0.4210493973310392 0.4567922813285392 0.0762731720388672  
0.1317882985663061 0.4551661441846377 0.5204229335519983  
0.6203473304930753 0.9722100671049105 0.1750479499628170  
0.4478684996395117 0.2526864556685453 0.4429791724531995  
0.2957567520003366 0.3449484430720986 0.5677092721493651  
0.7827518499714330 0.8650622118126634 0.1274044664437000  
0.3339703721248100 0.5949688233204071 0.4825019658749454  
0.8270441907729946 0.1160055915400733 0.2117994264409901  
0.2436939033025425 0.9622601645183195 0.5218997189128274  
0.7305500150174211 0.4792714287761086 0.1728467175673885  
0.4234287040293694 0.7542419312805393 0.4239010698700696  
0.0924711898852593 0.8048450956741391 0.4728826340335885  
0.5859925669831014 0.3191493526362805 0.2229496057732518  
0.0714016985502397 0.0775317027624922 0.5673346541433091  
0.5583287810246915 0.5983858591553997 0.1275997554298556  
0.7367388241171113 0.4446582832043120 0.5211765509701962  
0.2321559264423030 0.9755717609816301 0.1721256774878270  
0.9304174153459570 0.4439517428035202 0.4456028863895938  
0.7944611318197232 0.0661905273334398 0.5674576757934489  
0.2827569084123454 0.5828691931934387 0.1274830794146666  
0.8326661529166728 0.8276242877066622 0.4842338216962645

|                    |                    |                    |
|--------------------|--------------------|--------------------|
| 0.3258005705309728 | 0.3406173870450928 | 0.2123178072422576 |
| 0.6258789699537317 | 0.9518360016079299 | 0.5211680976164246 |
| 0.1208978412807724 | 0.4822500406975507 | 0.1755084909462354 |
| 0.9266196126928250 | 0.9439045635449475 | 0.4254575939822445 |
| 0.5938113828359946 | 0.6239609974362637 | 0.4712636648870401 |
| 0.0873396967213864 | 0.1236769732457077 | 0.2224840306563536 |
| 0.5699595716465709 | 0.3328758177889597 | 0.5677205390675581 |
| 0.0582405020810270 | 0.8492576885512406 | 0.1275971173519252 |
| 0.2630001750359270 | 0.1218893959294221 | 0.3987410878919775 |
| 0.7609914185574880 | 0.3067844878526316 | 0.3992664725247366 |
| 0.0215402893052001 | 0.3220208473466641 | 0.3864182271497967 |
| 0.5191863528402436 | 0.1210323954976289 | 0.3828228204275916 |
| 0.2277913401393477 | 0.4694812940694106 | 0.3508035449885156 |
| 0.6318714437171593 | 0.5035231405718363 | 0.3481990224329365 |
| 0.1277634853727037 | 0.9686644356123537 | 0.3462179684732689 |
| 0.7307661191556249 | 0.0035998286857151 | 0.3471295563955223 |
| 0.3335723253964247 | 0.8275842771886559 | 0.3105704966913194 |
| 0.8365830590619439 | 0.6334027304802134 | 0.3103099980168125 |
| 0.0951623324654420 | 0.6144222723170003 | 0.2981206245901618 |
| 0.5928493587422281 | 0.8181792004069592 | 0.2970270368183137 |
| 0.4256362209534288 | 0.4573273775533764 | 0.2707752591331172 |
| 0.9260521063123051 | 0.2638099363351856 | 0.2704922786362189 |
| 0.4219348190862817 | 0.9588013533614230 | 0.2511331020452729 |
| 0.9305206752854573 | 0.7625877112885604 | 0.2510529074554810 |

### Dense surface, $\alpha$ -quartz (001)

1.0000000000000000

|                     |                    |                     |
|---------------------|--------------------|---------------------|
| 9.8260002136230469  | 0.0000000000000000 | 0.0000000000000000  |
| -4.9130001068115234 | 8.5095663070678711 | 0.0000000000000000  |
| 0.0000000000000000  | 0.0000000000000000 | 32.7028007507324219 |

Si O

36 72

Direct

|                    |                    |                    |
|--------------------|--------------------|--------------------|
| 0.2470896418506072 | 0.2469729961354545 | 0.2944204633681764 |
| 0.2637552302837634 | 0.0074667135386406 | 0.2368698565797160 |
| 0.4211023803476195 | 0.3144308998666361 | 0.5450962036049276 |
| 0.0937025846573647 | 0.1462154284354540 | 0.5444279332955162 |
| 0.2612540437250246 | 0.2615775955003627 | 0.4650548292034742 |
| 0.0081786469899399 | 0.4820392685375054 | 0.3510525093887793 |
| 0.2734273459157919 | 0.0160465670643077 | 0.4077009417161577 |
| 0.1047970498283064 | 0.4024776943039328 | 0.1565889340703421 |
| 0.4320481306198900 | 0.0612622776140412 | 0.1574090123695839 |
| 0.7470896269494460 | 0.2469729961354545 | 0.2944204633681764 |
| 0.7637552302837705 | 0.0074667135386406 | 0.2368698565797160 |
| 0.9211023803476195 | 0.3144308998666361 | 0.5450962036049276 |
| 0.5937026070091065 | 0.1462154284354540 | 0.5444279332955162 |
| 0.7612539841203798 | 0.2615775955003627 | 0.4650548292034742 |
| 0.5081786665477139 | 0.4820392685375054 | 0.3510525093887793 |
| 0.7734273459157919 | 0.0160465670643077 | 0.4077009417161577 |
| 0.6047970349271452 | 0.4024776943039328 | 0.1565889340703421 |
| 0.9320481008175676 | 0.0612622776140412 | 0.1574090123695839 |
| 0.2470896716529296 | 0.7469730408389381 | 0.2944204633681764 |
| 0.2637552600860857 | 0.5074667824565111 | 0.2368698565797160 |
| 0.4211023803476195 | 0.8144308998666361 | 0.5450962036049276 |
| 0.0937026070091065 | 0.6462154433366152 | 0.5444279332955162 |
| 0.2612540735273470 | 0.7615776551050075 | 0.4650548292034742 |
| 0.0081786930904073 | 0.9820393877467950 | 0.3510525093887793 |
| 0.2734273459157919 | 0.5160465735835658 | 0.4077009417161577 |

0.1047970796306288 0.9024777539085775 0.1565889340703421  
0.4320481306198900 0.5612623074163636 0.1574090123695839  
0.7470896865540908 0.7469730408389381 0.2944204633681764  
0.7637552302837705 0.5074667824565111 0.2368698565797160  
0.9211023803476195 0.8144308998666361 0.5450962036049276  
0.5937026070091065 0.6462154433366152 0.5444279332955162  
0.7612540437250246 0.7615776551050075 0.4650548292034742  
0.5081787261523587 0.9820393877467950 0.3510525093887793  
0.7734273459157919 0.5160465735835658 0.4077009417161577  
0.6047970945317900 0.9024777539085775 0.1565889340703421  
0.9320481604222124 0.5612623074163636 0.1574090123695839  
0.4486885918476915 0.1705229943774924 0.5575978736374338  
0.0632217713051375 0.4788053534400660 0.5619881283985322  
0.2557606054234185 0.2825998019895621 0.5648278550831876  
0.4134960858322998 0.3268926945841812 0.4952379919658512  
0.2338087628517940 0.3987347672418764 0.4463910013520476  
0.3793153468172221 0.3165292358892557 0.3303839107217144  
0.4339453432186957 0.0458187391906506 0.3855459013661502  
0.1359031432159625 0.4471319595596412 0.3731281707608858  
0.1101570180245375 0.1521467178045199 0.4942676117848919  
0.2899640386500408 0.1768777799798329 0.4261298985956685  
0.0839525408732271 0.1142267552999741 0.3150999337455787  
0.2316231716083195 0.3906435615351995 0.2751889461228458  
0.2936330619485830 0.1714491122686326 0.2565738203715711  
0.1121406514820862 0.4234587662818896 0.2064065813051172  
0.4149705038550024 0.0499730242474783 0.2075766566817450  
0.0771628100858734 0.2307476877623955 0.1443420164976956  
0.2702613546152079 0.0356607680897127 0.1368480492794291  
0.4627843041215982 0.4247263987266265 0.1396487016049974  
0.9486885918476915 0.1705229943774924 0.5575978736374338  
0.5632217750304278 0.4788053534400660 0.5619881283985322  
0.7557606203245868 0.2825998019895621 0.5648278550831876  
0.9134960858322998 0.3268926945841812 0.4952379919658512  
0.7338087777529552 0.3987347672418764 0.4463910013520476  
0.8793153468172221 0.3165292358892557 0.3303839107217144  
0.9339453730210181 0.0458187391906506 0.3855459013661502  
0.6359031730182849 0.4471319595596412 0.3731281707608858  
0.6101570403762793 0.1521467178045199 0.4942676117848919  
0.7899640088477184 0.1768777799798329 0.4261298985956685  
0.5839525408732271 0.1142267552999741 0.3150999337455787  
0.7316232312129642 0.3906435615351995 0.2751889461228458  
0.7936330619485830 0.1714491122686326 0.2565738203715711  
0.6121406365809250 0.4234587662818896 0.2064065813051172  
0.9149704442503506 0.0499730242474783 0.2075766566817450  
0.5771627951847123 0.2307476877623955 0.1443420164976956  
0.7702613546152079 0.0356607680897127 0.1368480492794291  
0.9627842743192758 0.4247263987266265 0.1396487016049974  
0.4486885918476915 0.6705230539821372 0.5575978736374338  
0.0632217750304278 0.9788053534400660 0.5619881283985322  
0.2557606352257409 0.7825998913965293 0.5648278550831876  
0.4134961156346222 0.8268927839911484 0.4952379919658512  
0.2338087777529552 0.8987348268465212 0.4463910013520476  
0.3793153468172221 0.8165292656915781 0.3303839107217144  
0.4339453432186957 0.5458187801688439 0.3855459013661502  
0.1359031879194461 0.9471319893619636 0.3731281707608858  
0.1101570254751181 0.6521467625080035 0.4942676117848919  
0.2899640386500408 0.6768777799798329 0.4261298985956685  
0.0839525557743883 0.6142267702011353 0.3150999337455787  
0.2316231865094807 0.8906435615351995 0.2751889461228458  
0.2936330619485830 0.6714491867744385 0.2565738203715711  
0.1121406663832474 0.9234588258865344 0.2064065813051172  
0.4149705336573248 0.5499730689509690 0.2075766566817450  
0.0771628249870346 0.7307477175647179 0.1443420164976956

|                    |                    |                    |
|--------------------|--------------------|--------------------|
| 0.2702613844175303 | 0.5356608202437769 | 0.1368480492794291 |
| 0.4627843041215982 | 0.9247264285289489 | 0.1396487016049974 |
| 0.9486886514523363 | 0.6705230539821372 | 0.5575978736374338 |
| 0.5632217750304278 | 0.9788053534400660 | 0.5619881283985322 |
| 0.7557606203245868 | 0.7825998913965293 | 0.5648278550831876 |
| 0.9134960858322998 | 0.8268927839911484 | 0.4952379919658512 |
| 0.7338087777529552 | 0.8987348268465212 | 0.4463910013520476 |
| 0.8793153468172221 | 0.8165292656915781 | 0.3303839107217144 |
| 0.9339453730210181 | 0.5458187801688439 | 0.3855459013661502 |
| 0.6359031730182849 | 0.9471319893619636 | 0.3731281707608858 |
| 0.6101570403762793 | 0.6521467625080035 | 0.4942676117848919 |
| 0.7899640088477184 | 0.6768777799798329 | 0.4261298985956685 |
| 0.5839525408732271 | 0.6142267702011353 | 0.3150999337455787 |
| 0.7316231716083195 | 0.8906435615351995 | 0.2751889461228458 |
| 0.7936331215532277 | 0.6714491867744385 | 0.2565738203715711 |
| 0.6121406961855698 | 0.9234588258865344 | 0.2064065813051172 |
| 0.9149705634596401 | 0.5499730689509690 | 0.2075766566817450 |
| 0.5771628547893570 | 0.7307477175647179 | 0.1443420164976956 |
| 0.7702614142198527 | 0.5356608202437769 | 0.1368480492794291 |
| 0.9627843339239206 | 0.9247264285289489 | 0.1396487016049974 |

### Shifted surface, $\alpha$ -quartz (001)

1.00000000000000

|                     |                    |                     |
|---------------------|--------------------|---------------------|
| 9.8260002136230469  | 0.0000000000000000 | 0.0000000000000000  |
| -4.9130001068115234 | 8.5095663070678711 | 0.0000000000000000  |
| 0.0000000000000000  | 0.0000000000000000 | 38.2974014282226563 |

Si O

36 72

Direct

|                    |                    |                    |
|--------------------|--------------------|--------------------|
| 0.2262130943202507 | 0.2219364318211916 | 0.3755403707956333 |
| 0.2220995696963044 | 0.7095002116278124 | 0.3663061481017422 |
| 0.2601059166297262 | 0.4690096686228031 | 0.3226347004805064 |
| 0.1991281248193673 | 0.9670208517161569 | 0.3212735442750940 |
| 0.2707174059439410 | 0.2088400178021104 | 0.5159450669652585 |
| 0.2006781444716452 | 0.7113411605862865 | 0.5169467256402811 |
| 0.4946220775260031 | 0.4507354263609002 | 0.4216778905594794 |
| 0.4907048739910636 | 0.9468088638125067 | 0.4160176530508721 |
| 0.2548424619196652 | 0.4701218590027239 | 0.4714094371320527 |
| 0.2446127090219434 | 0.9552349872979207 | 0.4636194648433758 |
| 0.4543672962972707 | 0.2839456279688619 | 0.5830490982457377 |
| 0.4507478799880857 | 0.5310651343885056 | 0.2578291803124486 |
| 0.3481490125905466 | 0.7924092591625609 | 0.5857761530930290 |
| 0.3470093859270591 | 0.0317885119481431 | 0.2509995891320855 |
| 0.1251876219108183 | 0.1082803490942226 | 0.5845258397648934 |
| 0.1197350566622788 | 0.3585569056236011 | 0.2542324450088742 |
| 0.0186868716465725 | 0.6126475706825119 | 0.5841630677065623 |
| 0.0187511397582512 | 0.8703300098186944 | 0.2542567277856875 |
| 0.7262130943202507 | 0.2219364318211916 | 0.3755403707956333 |
| 0.7220995845974656 | 0.7095002116278124 | 0.3663061481017422 |
| 0.7601059166297262 | 0.4690096686228031 | 0.3226347004805064 |
| 0.6991281546216896 | 0.9670208517161569 | 0.3212735442750940 |
| 0.7707174357462634 | 0.2088400178021104 | 0.5159450669652585 |
| 0.7006781593727993 | 0.7113411605862865 | 0.5169467256402811 |
| 0.9946220477236807 | 0.4507354263609002 | 0.4216778905594794 |
| 0.9907048739910636 | 0.9468088638125067 | 0.4160176530508721 |
| 0.7548424619196652 | 0.4701218590027239 | 0.4714094371320527 |
| 0.7446127388242658 | 0.9552349872979207 | 0.4636194648433758 |
| 0.9543673260995931 | 0.2839456279688619 | 0.5830490982457377 |
| 0.9507478501857634 | 0.5310651343885056 | 0.2578291803124486 |
| 0.8481490423928761 | 0.7924092591625609 | 0.5857761530930290 |
| 0.8470094157293815 | 0.0317885119481431 | 0.2509995891320855 |

0.6251875921084959 0.1082803490942226 0.5845258397648934  
0.6197350715634400 0.3585569056236011 0.2542324450088742  
0.5186868809597982 0.6126475706825119 0.5841630677065623  
0.5187511174065094 0.8703300098186944 0.2542567277856875  
0.2319159206201817 0.3387062174131685 0.5000847588524238  
0.1555902282490536 0.8159486871944424 0.4920121592961806  
0.3666630111481766 0.2831354126659207 0.4042755667209477  
0.3783012361540585 0.8014492439097154 0.3906518141263362  
0.4143017711854284 0.5193361628667645 0.4488426872944515  
0.4025488930466565 0.9568683426781419 0.4508203164813196  
0.1123232242820293 0.4095710368362120 0.4431822501946598  
0.1349145991258638 0.9231015238307236 0.4293213748086728  
0.1278303851910749 0.0904634877265025 0.5418633718182804  
0.1175467718392227 0.3477945572558667 0.2969996837912632  
0.0463535561761006 0.6095029520563031 0.5417928652595734  
0.0406433701322584 0.8967604065678856 0.2968710737827180  
0.2921395494612611 0.1205426229884381 0.4825031915066376  
0.2579903473084002 0.6136557334308321 0.4929442109615039  
0.1792660163145712 0.7513628567201991 0.6023299866816814  
0.1810502607202693 0.0024126719181581 0.2355028502139476  
0.3751584566830175 0.6437331313977026 0.5926845973936636  
0.3764925513217179 0.8900958615970893 0.2388697844161243  
0.2930578184410422 0.1424926612339164 0.6002849564338533  
0.2895179622519350 0.3947572452077637 0.2395138850936362  
0.4828832616712546 0.4462765998289697 0.6003663463689719  
0.4874006004030988 0.6993133984426478 0.2433267314258671  
0.4880390143712177 0.9511097468682550 0.6027550237195811  
0.4853658363668814 0.1985983677964143 0.2368592142913712  
0.4291825089052139 0.2837909211331819 0.5404681797215929  
0.4230627656565886 0.5204504450257517 0.3006010247601338  
0.3440808984602057 0.8192267371142847 0.5436886595687724  
0.3440536594151169 0.0268723327964295 0.2937126684052132  
0.0999273778645602 0.2573892073937785 0.5925844077596594  
0.0939931642316907 0.5062027620447083 0.2453892199223802  
0.2402858720463925 0.1228873362545144 0.3434994732897110  
0.2546924403327466 0.6259421802717640 0.3331709367254163  
0.2390831424047164 0.3803609317867966 0.3594613315782098  
0.1781986163698193 0.8336776213852559 0.3491267247364505  
0.0585921710493693 0.1117535948575537 0.3947061510630334  
0.0816933219682596 0.5817426118472113 0.3911057142087202  
0.7319158908178593 0.3387062174131685 0.5000847588524238  
0.6555902580513759 0.8159486871944424 0.4920121592961806  
0.8666630111481766 0.2831354126659207 0.4042755667209477  
0.8783012361540585 0.8014492439097154 0.3906518141263362  
0.9143018009877508 0.5193361628667645 0.4488426872944515  
0.9025488930466636 0.9568683426781419 0.4508203164813196  
0.6123232242820293 0.4095710368362120 0.4431822501946598  
0.6349146214776056 0.9231015238307236 0.4293213748086728  
0.6278304298945585 0.0904634877265025 0.5418633718182804  
0.6175467345863197 0.3477945572558667 0.2969996837912632  
0.5463535710772547 0.6095029520563031 0.5417928652595734  
0.5406433775828390 0.8967604065678856 0.2968710737827180  
0.7921395792635835 0.1205426229884381 0.4825031915066376  
0.7579903771107226 0.6136557334308321 0.4929442109615039  
0.6792660163145712 0.7513628567201991 0.6023299866816814  
0.6810502756214305 0.0024126719181581 0.2355028502139476  
0.8751584864853399 0.6437331313977026 0.5926845973936636  
0.8764925811240403 0.8900958615970893 0.2388697844161243  
0.7930577886387198 0.1424926612339164 0.6002849564338533  
0.7895179622519350 0.3947572452077637 0.2395138850936362  
0.9828832318689322 0.4462765998289697 0.6003663463689719  
0.9874006302054212 0.6993133984426478 0.2433267314258671  
0.9880390143712106 0.9511097468682550 0.6027550237195811

0.9853658065645590 0.1985983677964143 0.2368592142913712  
0.9291825387075363 0.2837909211331819 0.5404681797215929  
0.9230627656565886 0.5204504450257517 0.3006010247601338  
0.8440808984602057 0.8192267371142847 0.5436886595687724  
0.8440537190197617 0.0268723327964295 0.2937126684052132  
0.5999274225680438 0.2573892073937785 0.5925844077596594  
0.5939931418799560 0.5062027620447083 0.2453892199223802  
0.7402858720463925 0.1228873362545144 0.3434994732897110  
0.7546924701350690 0.6259421802717640 0.3331709367254163  
0.7390831722070388 0.3803609317867966 0.3594613315782098  
0.6781986014686510 0.8336776213852559 0.3491267247364505  
0.5585922194781432 0.1117535948575537 0.3947061510630334  
0.5816933405947111 0.5817426118472113 0.3911057142087202

### Stable stishovite (100)

1.0000000000000000

4.1772000000000000 0.0000000000000000 0.0000000000000000  
0.0000000000000000 7.9953000000000003 0.0000000000000000  
0.0000000000000000 0.0000000000000000 54.5315999999999974

Si O

39 78

Direct

0.4127212705138277 0.1571787758347156 0.3024563876770472  
0.4127212705138277 0.4905127758347163 0.3024563876770472  
0.4127212705138277 0.8238457758347124 0.3024563876770472  
0.9131799999999970 0.3238399999999970 0.2631190000000032  
0.9131799999999970 0.6571730000000002 0.2631190000000032  
0.9131799999999970 0.9905070000000009 0.2631190000000032  
0.8880728675921148 0.3237850785954350 0.4985410330723710  
0.8880728675921148 0.6571190785954357 0.4985410330723710  
0.8880728675921148 0.9904520785954318 0.4985410330723710  
0.9123827964003084 0.3238371967215272 0.3417842640661064  
0.9107290247845228 0.3237988327384826 0.4204103143792182  
0.4118822277113381 0.1571408133238847 0.3810904426381470  
0.4088223244300053 0.1571138747210412 0.4598458332794664  
0.9123827964003084 0.6571701967215233 0.3417842640661064  
0.9107290247845228 0.6571318327384859 0.4204103143792182  
0.4118822277113381 0.4904748133238854 0.3810904426381470  
0.4088223244300053 0.4904478747210419 0.4598458332794664  
0.9123827964003084 0.9905041967215240 0.3417842640661064  
0.9107290247845228 0.9904658327384865 0.4204103143792182  
0.4118822277113381 0.8238078133238886 0.3810904426381470  
0.4088223244300053 0.8237808747210451 0.4598458332794664  
0.4136387294861734 0.8238352241652862 0.2237816123229521  
0.4136387294861734 0.4905012241652855 0.2237816123229521  
0.4136387294861734 0.1571682241652894 0.2237816123229521  
0.9382871324078863 0.6572289214045668 0.0276969669276284  
0.9382871324078863 0.3238949214045661 0.0276969669276284  
0.9382871324078863 0.9905619214045700 0.0276969669276284  
0.9139772035996927 0.6571768032784746 0.1844537359338929  
0.9156309752154783 0.6572151672615121 0.1058276856207812  
0.4144777722886630 0.8238731866761171 0.1451475573618524  
0.4175376755699958 0.8239001252789606 0.0663921667205329  
0.9139772035996927 0.3238438032784785 0.1844537359338929  
0.9156309752154783 0.3238821672615160 0.1058276856207812  
0.4144777722886630 0.4905391866761164 0.1451475573618524  
0.4175376755699958 0.4905661252789599 0.0663921667205329  
0.9139772035996927 0.9905098032784778 0.1844537359338929  
0.9156309752154783 0.9905481672615153 0.1058276856207812  
0.4144777722886630 0.1572061866761132 0.1451475573618524  
0.4175376755699958 0.1572331252789567 0.0663921667205329

0.7698092578029119 0.1571291116032043 0.5154060070743611  
0.7698092578029119 0.4904621116032004 0.5154060070743611  
0.7698092578029119 0.8237951116032036 0.5154060070743611  
0.2134881653599976 0.3238102254310178 0.3663341293047893  
0.2123202283517784 0.3237907033131648 0.4450969649680943  
0.6104679145762333 0.3238024038821976 0.3958138147281005  
0.6197914312626125 0.3237859821711311 0.4740541858614975  
0.7137175472560600 0.1571596263186947 0.3565383939315154  
0.7117848450983644 0.1571277887470117 0.4351115084965613  
0.1364254251409136 0.1571120824394328 0.4850894072614764  
0.1103121789921389 0.1571314185151422 0.4056917271513854  
0.2134881653599976 0.6571432254310210 0.3663341293047893  
0.2123202283517784 0.6571237033131609 0.4450969649680943  
0.6104679145762333 0.6571354038822008 0.3958138147281005  
0.6197914312626125 0.6571189821711343 0.4740541858614975  
0.7137175472560600 0.4904936263186954 0.3565383939315154  
0.7117848450983644 0.4904617887470053 0.4351115084965613  
0.1364254251409136 0.4904460824394334 0.4850894072614764  
0.1103121789921389 0.4904654185151429 0.4056917271513854  
0.2134881653599976 0.9904772254310217 0.3663341293047893  
0.2123202283517784 0.9904577033131616 0.4450969649680943  
0.6104679145762333 0.9904694038822015 0.3958138147281005  
0.6197914312626125 0.9904529821711279 0.4740541858614975  
0.7137175472560600 0.8238266263186986 0.3565383939315154  
0.7117848450983644 0.8237947887470085 0.4351115084965613  
0.1364254251409136 0.8237790824394295 0.4850894072614764  
0.1103121789921389 0.8237984185151390 0.4056917271513854  
0.1112030627303966 0.1571616438741614 0.3270446569816841  
0.1112030627303966 0.4904956438741621 0.3270446569816841  
0.1112030627303966 0.8238286438741653 0.3270446569816841  
0.6113078630770019 0.3238329507927205 0.3172032841998771  
0.6113078630770019 0.6571659507927237 0.3172032841998771  
0.6113078630770019 0.9904999507927243 0.3172032841998771  
0.2142425516874127 0.3238390842033141 0.2877011535545222  
0.2142425516874127 0.6571720842033173 0.2877011535545222  
0.2142425516874127 0.9905060842033180 0.2877011535545222  
0.7143545951851920 0.1571729932017831 0.2778700986043887  
0.7143545951851920 0.4905069932017838 0.2778700986043887  
0.7143545951851920 0.8238399932017799 0.2778700986043887  
0.0565507421967837 0.8238848883967975 0.0108319929256382  
0.0565507421967837 0.4905518883968014 0.0108319929256382  
0.0565507421967837 0.1572188883967982 0.0108319929256382  
0.6128718346400035 0.6572037745689769 0.1599038706952101  
0.6140397716482227 0.6572232966868370 0.0811410350319051  
0.2158920854237678 0.6572115961177971 0.1304241852718988  
0.2065685687373886 0.6572280178288707 0.0521838141385018  
0.1126424527439411 0.8238543736813000 0.1696996060684839  
0.1145751549016367 0.8238862112529901 0.0911264915034380  
0.6899345748590804 0.8239019175605691 0.0411485927385229  
0.7160478210078622 0.8238825814848596 0.1205462728486140  
0.6128718346400035 0.3238707745689808 0.1599038706952101  
0.6140397716482227 0.3238902966868409 0.0811410350319051  
0.2158920854237678 0.3238785961178010 0.1304241852718988  
0.2065685687373886 0.3238950178288675 0.0521838141385018  
0.1126424527439411 0.4905203736813064 0.1696996060684839  
0.1145751549016367 0.4905522112529894 0.0911264915034380  
0.6899345748590804 0.4905679175605684 0.0411485927385229  
0.7160478210078622 0.4905485814848589 0.1205462728486140  
0.6128718346400035 0.9905367745689801 0.1599038706952101  
0.6140397716482227 0.9905562966868402 0.0811410350319051  
0.2158920854237678 0.9905445961178003 0.1304241852718988  
0.2065685687373886 0.9905610178288669 0.0521838141385018  
0.1126424527439411 0.1571873736813032 0.1696996060684839



|                    |                    |                    |
|--------------------|--------------------|--------------------|
| 0.1145751549016367 | 0.1572192112529933 | 0.0911264915034380 |
| 0.6899345748590804 | 0.1572349175605652 | 0.0411485927385229 |
| 0.7160478210078622 | 0.1572155814848557 | 0.1205462728486140 |
| 0.7151569372695974 | 0.8238523561258333 | 0.1991933430183153 |
| 0.7151569372695974 | 0.4905183561258326 | 0.1991933430183153 |
| 0.7151569372695974 | 0.1571853561258365 | 0.1991933430183153 |
| 0.2150521369229992 | 0.6571810492072814 | 0.2090347158001293 |
| 0.2150521369229992 | 0.3238480492072782 | 0.2090347158001293 |
| 0.2150521369229992 | 0.9905140492072775 | 0.2090347158001293 |
| 0.6121174483125884 | 0.6571749157966806 | 0.2385368464454771 |
| 0.6121174483125884 | 0.3238419157966845 | 0.2385368464454771 |
| 0.6121174483125884 | 0.9905079157966838 | 0.2385368464454771 |
| 0.1120054048148091 | 0.8238410067982187 | 0.2483679013956106 |
| 0.1120054048148091 | 0.4905070067982180 | 0.2483679013956106 |
| 0.1120054048148091 | 0.1571740067982148 | 0.2483679013956106 |

### Dense stishovite (110)

1.0000000000000000

|                    |                    |                     |
|--------------------|--------------------|---------------------|
| 7.9953000000000003 | 0.0000000000000000 | 0.0000000000000000  |
| 0.0000000000000000 | 5.9074999999999998 | 0.0000000000000000  |
| 0.0000000000000000 | 0.0000000000000000 | 36.1509000000000000 |

Si O

38 76

Direct

|                    |                    |                    |
|--------------------|--------------------|--------------------|
| 0.2340155388335880 | 0.8012375048130607 | 0.3916585970973121 |
| 0.5666519209438117 | 0.8013094139785495 | 0.3916462363928219 |
| 0.8992316078195304 | 0.8012774881684323 | 0.3916574397639300 |
| 0.0666711868349918 | 0.3012471229790046 | 0.3916652529346372 |
| 0.4007709435196672 | 0.3012803386168156 | 0.3916546333521786 |
| 0.7324436594400267 | 0.3012780651798906 | 0.3916557597082093 |
| 0.0666705889390223 | 0.8012521802263404 | 0.4749206494003927 |
| 0.0666777227107470 | 0.8012232311789369 | 0.3083997043385424 |
| 0.3998698826282219 | 0.8012157782669067 | 0.4754697498585100 |
| 0.3998733462931918 | 0.8012094148641374 | 0.3078265650631940 |
| 0.7333965737530731 | 0.8012257073757800 | 0.4754780329771310 |
| 0.7333872943163119 | 0.8012293401090053 | 0.3078175302777971 |
| 0.0666766792714128 | 0.3013589689897831 | 0.5518802918440570 |
| 0.0666606223586652 | 0.3013297583314937 | 0.2314271270027132 |
| 0.3996133628530593 | 0.3013300945368823 | 0.5598517797146426 |
| 0.3995906890253872 | 0.3013024980234700 | 0.2234368910832495 |
| 0.7337450083792985 | 0.3014290166591923 | 0.5598279576638177 |
| 0.7337368614406858 | 0.3013933438569615 | 0.2234599487089560 |
| 0.2363725758211653 | 0.3012349010787128 | 0.4738058821283191 |
| 0.2363513849577772 | 0.3012234448435988 | 0.3095113143440826 |
| 0.5666357823196124 | 0.3012481294307646 | 0.4758648856929278 |
| 0.5666200659817922 | 0.3012531510073685 | 0.3074439200441040 |
| 0.8969589381748007 | 0.3012028581810652 | 0.4737864815358118 |
| 0.8969633049835433 | 0.3011892310380309 | 0.3095358124999815 |
| 0.2251211918955054 | 0.8012639354026450 | 0.5593208608029538 |
| 0.2250856814529059 | 0.8012400181777879 | 0.2239750937098017 |
| 0.5666163525063387 | 0.8014159136178090 | 0.5593108140866794 |
| 0.5666014517026999 | 0.8013794717136625 | 0.2239838954266818 |
| 0.9080941462591136 | 0.8014132532908012 | 0.5592773645244302 |
| 0.9081073864121197 | 0.8013882826084707 | 0.2240187816893759 |
| 0.8703247807041981 | 0.3016387718545558 | 0.6382614973063582 |
| 0.8702825427553409 | 0.3016203247143744 | 0.1450228326155805 |
| 0.3733231282743661 | 0.8015924195272246 | 0.6422428154416298 |
| 0.3733022206750641 | 0.8015616303062608 | 0.1410690588872596 |
| 0.2629794183432766 | 0.3015723315512062 | 0.6382590662833136 |
| 0.2629744149965424 | 0.3015315206142015 | 0.1450306728641615 |
| 0.7596320798708935 | 0.8016609615058308 | 0.6422495168482637 |

0.7596151486573161 0.8016423786119785 0.1410664195543107  
0.0666717372235506 0.3011933353256281 0.4420433000831125  
0.0666678569751722 0.3011701291622416 0.3412865460556655  
0.4022616131173410 0.3012399265272073 0.4426103880288634  
0.4022236206950930 0.3012555163897632 0.3407006067972008  
0.7310331388918090 0.3011966817674378 0.4425993725410654  
0.7310436829150989 0.3012014497697367 0.3407116524448255  
0.0666562939411178 0.8012646504753926 0.5245609583892005  
0.0666463845047199 0.8012521238319507 0.2587421066975833  
0.3970491992766697 0.8013062893402458 0.5281449509725874  
0.3970411224309107 0.8012757029166004 0.2551574780293728  
0.7362061793586639 0.8013522635473491 0.5281118009247071  
0.7362031791853152 0.8013241860834214 0.2551936394571441  
0.0666155938825785 0.3013203996049104 0.5048896332644314  
0.0665930200521145 0.3012952803462660 0.2784231776413449  
0.3987885165460628 0.3012292445165649 0.5071491587433862  
0.3987620003869437 0.3012515411780907 0.2761570074610633  
0.7345554196836451 0.3012017914843744 0.5071319220249548  
0.7345551024912015 0.3011825525365665 0.2761755838573933  
0.0664861330631032 0.8013177367571217 0.5900911621341217  
0.0664748604801157 0.8013126679400288 0.1932034638975172  
0.3925408365889296 0.8014312632875106 0.5942401282252532  
0.3925166582507459 0.8013917931608564 0.1890705835970171  
0.7403527496384509 0.8014663671001850 0.5942238945792894  
0.7403463041789297 0.8014320748274952 0.1890863588271926  
0.2344371134592304 0.9953290575198895 0.4746886507192512  
0.2344281863356699 0.9953290856818171 0.3086197766112402  
0.5665925871494388 0.9939749377688404 0.4758759439775622  
0.5665764157026053 0.9939927877993873 0.3074286585502805  
0.8988821069932790 0.9953240009181261 0.4746895839934243  
0.8988862901810843 0.9953097908720763 0.3086236890576103  
0.2277478754302267 0.4932131109571243 0.5578760375453469  
0.2277096917421175 0.4931727554911540 0.2254086024859428  
0.5666389307313880 0.4992893386714697 0.5579716012092381  
0.5666332582617016 0.4992420362291475 0.2253125782702152  
0.9056147631495204 0.4932847501434321 0.5578469187314381  
0.9056183914110358 0.4932456318334805 0.2254325114912248  
0.2344468446537661 0.6071624608253287 0.4746798809346556  
0.2344344495964672 0.6071437597845949 0.3086267033792793  
0.5665983411334017 0.6084583046375963 0.4758813721086516  
0.5665945210735274 0.6084675012075639 0.3074242864907749  
0.8988778167611918 0.6071633129020177 0.4746877997331208  
0.8988852754074732 0.6071494596770551 0.3086238339389290  
0.2277149645707110 0.1094674130652629 0.5578810192665640  
0.2276854925854516 0.1094522226088109 0.2254044592196720  
0.5666421513619144 0.1034521414197205 0.5579908217438562  
0.5666323624004860 0.1034287881424251 0.2252932309989048  
0.9055857990328565 0.1094851958850045 0.5578538749763048  
0.9055976624682428 0.1094604866046812 0.2254328524306993  
0.2874498753493076 0.0414984187716173 0.6572954380054392  
0.2874916832238220 0.0414659028185129 0.1260045339654709  
0.0666424568947751 0.3015068067034850 0.6243365435298616  
0.0666160726282815 0.3014949509526849 0.1588995756774776  
0.5664810248692224 0.8016798598124621 0.6560930602250301  
0.5664595488068308 0.8016929387484569 0.1272563394464935  
0.8457164589576640 0.0415191485303460 0.6572883487758454  
0.8456347892833347 0.0414986073994170 0.1260106695866281  
0.2874758038056749 0.5616355803479895 0.6572866470665333  
0.2875375823163449 0.5615861286966594 0.1260140683702472  
0.7343035768072943 0.3015090372210980 0.6063052757999225  
0.7342683403927767 0.3014930848174641 0.1769840566344826  
0.3992235160963756 0.3014682854118857 0.6063402978983090  
0.3992340064276191 0.3014285411694464 0.1769490393645175

|                    |                    |                    |
|--------------------|--------------------|--------------------|
| 0.8456941963815595 | 0.5617347415479516 | 0.6572846387548353 |
| 0.8455673153671613 | 0.5617017292927362 | 0.1260032845061775 |
| 0.0665882438876359 | 0.8012054529028118 | 0.4238274367626804 |
| 0.0665944532727558 | 0.8012119373461013 | 0.3594871464617903 |
| 0.4007275955057224 | 0.8012532119836387 | 0.4239579720615889 |
| 0.4007044072672976 | 0.8012673549517414 | 0.3593499293680508 |
| 0.7325581658184817 | 0.8012089503253271 | 0.4239576496681415 |
| 0.7325731002669790 | 0.8012200507020518 | 0.3593497409197620 |
| 0.2341340710110987 | 0.1075215295771024 | 0.3916650795556769 |
| 0.5665975062421604 | 0.1074029050571743 | 0.3916487450002973 |
| 0.8991787790996750 | 0.1075388257399496 | 0.3916635079351916 |
| 0.2341109030050686 | 0.4949956618539096 | 0.3916586087812780 |
| 0.5665902987091278 | 0.4951358672732931 | 0.3916457320314822 |
| 0.8991812635281921 | 0.4949765677223325 | 0.3916599378401815 |
